# Supplementary material
Source: Springer Nature journal article supplement (https://www.springermedizin.de/resource/supplementary/12913_2013_2984_MOESM1_ESM.pdf/9532704)
Supplement: MOESM1 [file 9532704]

Table S1: Number of Home Care Clients Assessed with the RAI-HC by Year and Province/Territory

| <b>Year</b> | <b>Nova Scotia</b> | <b>Ontario</b> | <b>Yukon</b> |
|-------------|--------------------|----------------|--------------|
| 2001        | 1,091              | 0              | 0            |
| 2002        | 3,929              | 0              | 0            |
| 2003        | 9,126              | 15             | 0            |
| 2004        | 11,060             | 21             | 0            |
| 2005        | 11,675             | 48             | 0            |
| 2006        | 11,854             | 205            | 28           |
| 2007        | 12,563             | 102,632        | 79           |
| 2008        | 12,477             | 126,462        | 102          |
| 2009        | 13,241             | 135,378        | 141          |
| 2010        | 4,583              | 132,626        | 161          |

Table S2: Number of Persons in Long-Term and Complex-Continuing Care Assessed with the RAI 2.0 by Year and Province/Territory

| <b>Year</b> | <b>British Columbia</b> | <b>Manitoba</b> | <b>Newfound.&amp; Labrador</b> | <b>Nova Scotia</b> | <b>Ontario</b> | <b>Yukon</b> |
|-------------|-------------------------|-----------------|--------------------------------|--------------------|----------------|--------------|
| 2003        | 1                       | 0               | 0                              | 3                  | 14,117         | 0            |
| 2004        | 0                       | 0               | 0                              | 348                | 18,303         | 0            |
| 2005        | 0                       | 0               | 0                              | 483                | 21,254         | 0            |
| 2006        | 184                     | 0               | 0                              | 470                | 32,263         | 0            |
| 2007        | 1,843                   | 15              | 0                              | 511                | 41,591         | 0            |
| 2008        | 3,997                   | 4,580           | 37                             | 508                | 52,688         | 148          |
| 2009        | 18,409                  | 6,655           | 49                             | 716                | 95,593         | 143          |
| 2010        | 19,163                  | 6,721           | 497                            | 752                | 107,270        | 153          |

Table S3: Number of Mental Health Inpatients Assessed with the RAI-MH in Ontario by Year of Assessment

| <b>Year</b> | <b>No. Persons</b> |
|-------------|--------------------|
| 2005        | 8,211              |
| 2006        | 37,428             |
| 2007        | 38,875             |
| 2008        | 38,550             |
| 2009        | 38,621             |
| 2010        | 31,195             |

Table S4: Number of Persons with at Least One interRAI Assessment and Hospital Visit by Year and Province

| <b>Year</b> | <b>Alberta</b> | <b>British Columbia</b> | <b>Manitoba</b> | <b>New Brunswick</b> | <b>Newfound.&amp; Labrador</b> | <b>Nova Scotia</b> | <b>Ontario</b> | <b>Prince Edward</b> |
|-------------|----------------|-------------------------|-----------------|----------------------|--------------------------------|--------------------|----------------|----------------------|
| 2001        | 0              | 0                       | 4               | 0                    | 0                              | 4                  | 54             | 0                    |
| 2002        | 0              | 1                       | 5               | 0                    | 0                              | 5                  | 85             | 0                    |
| 2003        | 1              | 13                      | 19              | 0                    | 2                              | 61                 | 364            | 0                    |
| 2004        | 46             | 1,808                   | 729             | 149                  | 49                             | 8,870              | 48,477         | 15                   |
| 2005        | 88             | 3,324                   | 1,111           | 187                  | 87                             | 10,771             | 83,851         | 25                   |
| 2006        | 156            | 5,032                   | 1,675           | 231                  | 125                            | 10,697             | 99,970         | 32                   |
| 2007        | 177            | 6,969                   | 2,269           | 231                  | 218                            | 10,753             | 118,793        | 43                   |
| 2008        | 180            | 8,383                   | 2,787           | 234                  | 269                            | 10,619             | 129,810        | 44                   |
| 2009        | 158            | 9,384                   | 3,182           | 175                  | 337                            | 8,912              | 130,277        | 43                   |
| 2010        | 109            | 8,178                   | 2,650           | 73                   | 306                            | 4,804              | 122,159        | 34                   |

Table S5: Number of Persons with at Least One interRAI Assessment and Emergency Department Visit by Year and Province/territory

| <b>Year</b> | <b>British Columbia</b> | <b>Nova Scotia</b> | <b>Ontario</b> | <b>Prince Edward</b> |
|-------------|-------------------------|--------------------|----------------|----------------------|
| 2002        | 13                      | 0                  | 24,212         | 0                    |
| 2003        | 54                      | 564                | 57,458         | 6                    |
| 2004        | 101                     | 1,300              | 101,842        | 10                   |
| 2005        | 146                     | 2,109              | 160,622        | 18                   |
| 2006        | 240                     | 1,661              | 218,062        | 21                   |
| 2007        | 655                     | 1,561              | 259,950        | 21                   |
| 2008        | 461                     | 1,492              | 273,738        | 28                   |
| 2009        | 257                     | 1,206              | 259,418        | 22                   |
| 2010        | 216                     | 732                | 224,144        | 14                   |

Table S6: RAI-HC Diagnoses Information – Section J

| <b>Neurological Condition</b> <sup>a</sup> | <b>Item</b> <sup>b</sup> |
|--------------------------------------------|--------------------------|
| Alzheimer’s Disease and Related Dementias  | j1g, j1h                 |
| Multiple Sclerosis                         | j1k                      |
| Parkinsonism                               | j1l                      |
| Head Trauma                                | j1i                      |

<sup>a</sup>Disease is recorded if present and monitored or treated by home care professional or present and not subject to treatment or monitoring

<sup>b</sup>Items j2a – j2d correspond to ICD-10-CA Codes for “Other current diagnosis”. HCRS data set does not include these items.

Table S7: RAI 2.0 Disease Diagnoses – Section I

| <b>Neurological Condition</b> <sup>a</sup> | <b>Item</b> <sup>b</sup> |
|--------------------------------------------|--------------------------|
| Alzheimer’s Disease and Related Dementias  | i1r, i1v                 |
| Amyotrophic Lateral Sclerosis              | i1q                      |
| Cerebral Palsy                             | i1t                      |
| Seizure Disorder                           | i1cc                     |
| Huntington’s Chorea                        | i1x                      |
| Multiple Sclerosis                         | i1y                      |
| Parkinson’s Disease                        | i1aa                     |
| Traumatic Brain Injury                     | i1ee                     |

<sup>a</sup>Disease is recorded if it has a relationship to current ADL, cognitive, mood, and behaviour status, medical treatments, nurse monitoring, or risk of death

<sup>b</sup>Items i3a – i3f correspond to ICD-10-CA Codes for “Other current diagnosis”

Table S8: ICD-10-CA codes for Neurological Conditions

| <b>Neurological Condition</b>             | <b>ICD-10-CA <sup>a</sup></b>                                              |
|-------------------------------------------|----------------------------------------------------------------------------|
| Alzheimer’s Disease and Related Dementias | G30, F00, F01, F02, F03                                                    |
| Cerebral Palsy                            | G80                                                                        |
| Epilepsy                                  | G40                                                                        |
| Huntington’s Disease                      | G10, F02.2                                                                 |
| Motor Neuron Disease                      | G12                                                                        |
| Multiple Sclerosis                        | G35                                                                        |
| Parkinsonism                              | F02.3, G20, G21, G22                                                       |
| Traumatic Brain Injuries                  | F07.2, S02.0, S02.1, S02.3, S02.7,<br>S02.8, S02.9, S06, S07, T06.0, T90.5 |

<sup>a</sup>These are the codes used for neurological conditions for all care settings
